---

# Systematic Reviews

---

A systematic review provides a scientific rationale for a position statement and undergoes critical peer review before submission to the Professional Practice Committee for approval. Effective January 2010, technical reports were replaced with systematic reviews, for which a priori search and inclusion/exclusion criteria are developed and

published. Listed below are recent reviews.

**Macronutrients, Food Groups, and Eating Patterns in the Management of Diabetes: A Systematic Review of the Literature, 2010**

Madelyn L. Wheeler, Stephanie A. Dunbar, Lindsay M. Jaacks, Wahida Karmally, Elizabeth J. Mayer-Davis, Judith Wylie-Rosett,

and William S. Yancy Jr.  
*Diabetes Care* 35:434–445, 2012

**Cost-Effectiveness of Interventions to Prevent and Control Diabetes Mellitus: A Systematic Review**

Rui Li, Ping Zhang, Lawrence E. Barker, Farah M. Chowdhury, and Xuanping Zhang  
*Diabetes Care* 33:1872–1894, 2010
